# Supplementary material
Source: PubMed Central journal article supplement (PMC6371984)
Supplement: NIHMS1505506-supplement-2.pdf [file NIHMS1505506-supplement-2.pdf]

| Animal | Fig. 1a-h; Sup Fig. 4 | Fig. 1i; Sup Fig. 1c-d | Fig. 1 in-text stats (event rate; duration; correlation strength at 2min); Sup Fig. 3 | Sup Fig. 1a-b; Fig. 3d-e; Sup Fig. 10 | Sup Fig. 2                         | Fig. 2  | Sup Fig. 5     | Fig. 3a-c | Fig. 3g-h; Sup Fig. 6e-f             |
|--------|-----------------------|------------------------|---------------------------------------------------------------------------------------|---------------------------------------|------------------------------------|---------|----------------|-----------|--------------------------------------|
| F1579  |                       |                        | 32 (1)                                                                                | 31 (0); 32 (1)                        | 31 (0); 32 (1)                     |         |                |           | 31 (0); 32 (1)                       |
| F1581  |                       |                        | 32 (1)                                                                                | 30 (-1); 31 (0); 32 (1)               | 30 (-1); 31 (0); 32 (1)            |         |                |           | 30 (-1); 31 (0); 32 (1)              |
| F1642  |                       |                        | 30 (0)                                                                                | 23 (-7); 30 (0)                       | 23 (-7); 30 (0)                    | 38 (5)  |                |           | 31 (-2); 33 (0); 36 (3); 38 (5)      |
| F1665  |                       |                        | 31 (0)                                                                                | 21 (-10); 27 (-4); 29 (-2); 31 (0)    | 21 (-10); 27 (-4); 29 (-2); 31 (0) |         |                | 23 (-7)   | 23 (-7); 30 (0)                      |
| F1666  |                       |                        | 30 (0)                                                                                | 22 (-8); 27 (-3); 30 (0)              | 22 (-8); 27 (-3); 30 (0)           |         |                |           | 21 (-10); 27 (-4); 29 (-2); 31 (0)   |
| F1667  |                       |                        | 35 (0)                                                                                | 31+ (-4); 35 (0)                      | 26 (-2); 28 (0)                    |         |                |           | 22 (-8); 27 (-3); 30 (0)             |
| F1768  |                       |                        | 35 (1)                                                                                | 27+ (-7); 28+ (-6); 31+ (-3); 35 (1)  | 31+ (-4); 35 (0)                   |         |                |           | 31+ (-4); 35 (0)                     |
| F1770  |                       |                        | 37* (5)                                                                               | 30* (-2); 37* (5)                     | 30* (-2); 37* (5)                  | 37* (5) |                |           | 27+ (-7); 28+ (-6); 31+ (-3); 35 (1) |
| F1785  | 30* (-2); 36* (4)     | 30* (-2); 36* (4)      | 36* (4)                                                                               | 28+ (-4); 30* (-2); 36* (4)           | 28+ (-4); 30* (-2); 36* (4)        |         |                |           | 30* (-2); 37* (5)                    |
| F1786  | 28* (-3); 35* (4)     | 28* (-3); 35* (4)      | 35* (4)                                                                               | 28* (-3); 35* (4)                     | 28* (-3); 35* (4)                  |         |                |           | 28+ (-4); 30* (-2); 36* (4)          |
| F1492  |                       |                        |                                                                                       |                                       |                                    |         |                |           | 28* (-3); 35* (4)                    |
| F1509  |                       |                        |                                                                                       |                                       |                                    | 39 (9)  | 39 (9) -OR     |           |                                      |
| F1532  |                       |                        |                                                                                       |                                       |                                    | 37 (5)  | 37 (5) -OR     |           |                                      |
| F1643  |                       |                        |                                                                                       |                                       |                                    | 39 (7)  | 39 (7) -OR     |           |                                      |
| F1654  |                       |                        |                                                                                       |                                       |                                    | 37 (5)  | 37 (5) -OR/OD  |           |                                      |
| F1655  |                       |                        |                                                                                       |                                       |                                    | 47 (12) | 47 (12) -OR    |           |                                      |
| F2122  |                       |                        |                                                                                       |                                       |                                    | 43 (16) | 43 (16) -OR/OD |           |                                      |
| F2124  |                       |                        |                                                                                       |                                       |                                    |         |                |           |                                      |
| F2125  |                       |                        |                                                                                       |                                       |                                    |         |                |           |                                      |
| F1953  |                       |                        |                                                                                       |                                       |                                    |         |                |           |                                      |
| F1954  |                       |                        |                                                                                       |                                       |                                    |         |                |           |                                      |
| F1957  |                       |                        |                                                                                       |                                       |                                    |         |                |           |                                      |

| Animal | Sup Fig. 6a-d            | Fig. 4a-g | Sup Fig. 7 | Sup Fig. 8a; Sup Fig. 9            | Sup Fig. 13                          | Sup Fig. 14                        | Sup Fig. 15 | Sup Video 1-4 | Sup Video 5 |
|--------|--------------------------|-----------|------------|------------------------------------|--------------------------------------|------------------------------------|-------------|---------------|-------------|
| F1579  |                          |           |            | 31 (0); 32 (1)                     | 31 (0); 32 (1)                       | 31 (0); 32 (1)                     |             |               |             |
| F1581  |                          |           |            | 30 (-1); 31 (0); 32 (1)            | 30 (-1); 31 (0); 32 (1)              | 30 (-1); 31 (0); 32 (1)            |             |               |             |
| F1642  |                          |           |            | 31 (-2); 33 (0); 36 (3); 38 (5)    | 31 (-2); 33 (0); 36 (3); 38 (5)      | 31 (-2); 33 (0); 36 (3); 38 (5)    |             |               |             |
| F1664  |                          |           | 23 (-7)    | 23 (-7); 30 (0)                    | 23 (-7); 30 (0)                      | 23 (-7); 30 (0)                    |             |               | 23 (-7)     |
| F1665  |                          |           | 21 (-10)   | 21 (-10); 27 (-4); 29 (-2); 31 (0) | 21 (-10); 27 (-4); 29 (-2); 31 (0)   | 21 (-10); 27 (-4); 29 (-2); 31 (0) |             |               |             |
| F1666  | 22 (-8); 27 (-3); 30 (0) |           | 22 (-8)    | 22 (-8); 27 (-3); 30 (0)           | 22 (-8); 27 (-3); 30 (0)             | 22 (-8); 27 (-3); 30 (0)           |             |               |             |
| F1667  |                          |           |            | 26 (-2); 28 (0)                    | 26 (-2); 28 (0)                      | 26 (-2); 28 (0)                    |             |               |             |
| F1768  |                          |           |            | 31+ (-4); 35 (0)                   | 31+ (-4); 35 (0)                     |                                    |             |               |             |
| F1770  |                          |           |            | 27+ (-7); 28+ (-6)                 | 27+ (-7); 28+ (-6); 31+ (-3); 35 (1) |                                    |             |               |             |
| F1784  |                          |           |            | 30* (-2); 37* (5)                  | 30* (-2); 37* (5)                    |                                    |             |               |             |
| F1785  |                          |           |            | 28+ (-4); 30* (-2); 36* (4)        | 28+ (-4); 30* (-2); 36* (4)          | 30* (-2)                           | 30* (-2)    | 30+* (-2)     |             |
| F1786  |                          |           |            | 28* (-3); 35* (4)                  | 28* (-3); 35* (4)                    |                                    |             |               |             |
| F1492  |                          |           |            |                                    |                                      |                                    |             |               |             |
| F1509  |                          |           |            |                                    |                                      |                                    |             |               |             |
| F1532  |                          |           |            |                                    |                                      |                                    |             |               |             |
| F1643  |                          |           |            |                                    |                                      |                                    |             |               |             |
| F1654  |                          |           |            |                                    |                                      |                                    |             |               |             |
| F1655  |                          |           |            |                                    |                                      |                                    |             |               |             |
| F2122  | 25 (?)                   |           |            |                                    |                                      |                                    |             |               |             |
| F2124  | 24 (?)                   |           |            |                                    |                                      |                                    |             |               |             |
| F2125  | 22 (?)                   |           |            |                                    |                                      |                                    |             |               |             |
| F1953  |                          |           | 27 (?)     |                                    |                                      |                                    |             |               |             |
| F1954  |                          |           | 29 (?)     |                                    |                                      |                                    |             |               |             |
| F1957  |                          |           | 24 (?)     |                                    |                                      |                                    |             |               |             |

Numbers indicate Age (EO) at time of experiment.

Example experiments are highlighted in yellow and bold text.

EO is unknown for acute imaging experiments performed prior to eye opening and is indicated by (?)

+ indicates awake activity

^ indicates comparison of awake and anesthetized activity

\* indicates pooling awake and anesthetized activity

**Supplemental Table 1: List of experiments used in analysis.**
